# Supplementary material for: A novel cuproptosis-related lncRNAs signature predicts prognosis in bladder cancer
Source: Aging (Albany NY). 2023 Jul 9;15(13):6445–66. doi: 10.18632/aging.204861 (PMC10373974; doi:10.18632/aging.204861)
Supplement: Supplementary Table 1 [file aging-15-204861-s002.xlsx]

## Sheet: Sheet1
Supplementary Table 1. A total of 548 cuproptosis-related lncRNAs.
ID
AC015849.3
AL121829.2
LINC00165
GAS5
TOLLIP-AS1
AC010615.2
AL031600.1
Z82243.1
AC009065.8
AC063948.1
AC068594.1
ZNF426-DT
AL589765.4
AC016737.1
KRT7-AS
AC005046.1
SNHG1
AL391834.1
AL451165.2
AC090589.3
AC005387.1
AL359915.2
AC090579.1
AC060766.4
AC018690.1
ARHGAP5-AS1
TAPT1-AS1
AC092171.3
AC004148.2
SH3BP5-AS1
AC007383.2
AC108673.3
AC025171.2
GAS6-DT
LINC01612
SNHG18
AL139287.1
AL024508.2
ACVR2B-AS1
AC009549.1
AC004908.1
AC023510.2
AL161729.4
AL590652.1
LINC01376
AP001628.1
Z83843.1
AC090739.1
AC021078.1
AC010487.2
AL353622.1
AC108134.4
AC018521.6
MAP3K14-AS1
AC009318.4
SNHG20
AC114810.1
AC010422.2
AL390719.2
AC012557.1
AC011481.1
AC016957.2
AL354919.2
ITPR1-DT
LINC02446
AC002128.1
BX322562.1
AL513320.1
AC006378.1
AC104463.2
SNHG7
ZKSCAN2-DT
EBLN3P
AC021321.1
DLEU2
LINC01943
LINC02323
AC005104.1
AL121772.3
AP005899.1
ZNF436-AS1
LINC02562
SPINT1-AS1
LINC01089
LINC01144
AC018904.1
AC010186.3
AP000251.1
AC016877.3
AC010761.1
AC007038.2
AC108860.2
AL078581.1
AC004492.1
AL391244.3
AL008582.1
AC127070.1
MINCR
SCAMP1-AS1
NORAD
AC008915.2
AC004918.3
AC073534.1
AC084824.5
N4BP2L2-IT2
HOTAIRM1
CBR3-AS1
AL157838.1
LINC00294
AC106900.2
AC007388.1
SENCR
LINC01806
AL135999.3
FMR1-IT1
AC004253.1
ARRDC1-AS1
AC007128.1
TRIM52-AS1
AC008115.3
AL354696.1
AC087752.3
LINC00685
AC078909.2
AC024060.1
AL162458.1
ZFAS1
C5orf17
ATP1B3-AS1
LINC02195
AP000692.1
AC092535.4
AC090425.1
AC009065.4
SNHG15
AC026367.2
AC007684.1
AC007292.1
AGBL5-IT1
AC095057.3
GATA3-AS1
AC025175.1
AC087276.1
NUTM2A-AS1
NEAT1
EPB41L4A-AS1
AC109460.2
AP003392.4
AL354892.2
AC034236.2
FP671120.4
DANCR
AC061992.1
MALAT1
BRWD1-AS2
SSSCA1-AS1
AL139123.1
AC142472.1
GARS-DT
AC083880.1
AC011503.1
AC018413.1
AC004908.3
LINC02542
AL353804.1
AC015813.1
AC024075.1
AL137077.2
AC023509.4
AL122023.1
AC004812.2
CEBPA-DT
AL359715.3
AC012360.3
AC024075.3
HM13-IT1
AP001330.5
AL441992.1
FAM83A-AS1
AC092171.4
AC016355.1
SNHG12
AC008764.2
AL391244.1
IPO5P1
AC092794.1
AC073957.3
AC007406.5
AC067852.2
AL606489.1
AC092306.1
AL359220.1
AC092171.5
MIR31HG
AL157392.4
AC135050.3
AF117829.1
AP002026.1
AL021068.1
AC006001.2
AC002553.2
OCIAD1-AS1
AC005014.2
AL357079.1
SP2-AS1
AP003469.4
AL683813.1
AC092803.2
AC017100.1
AC104695.3
AL590723.1
AC009318.3
AC005261.1
AC106782.2
AL109613.1
AC139795.2
AC092849.1
RAD51-AS1
CASC22
AC083843.2
KMT2E-AS1
AL139349.1
AC106771.1
EXOC3-AS1
AC253576.2
AC022150.4
AC006042.1
AC020978.4
AC007998.4
AC015726.1
AC006333.2
CAMTA1-DT
AF131215.6
AC018809.1
AC010834.3
AL139246.1
AC138207.5
DM1-AS
AL135818.2
SNHG4
AC145423.2
AC090198.1
GAS5-AS1
AL117379.1
AL356740.1
PPP1R26-AS1
AC006026.3
MIR200CHG
AC025287.3
CH17-340M24.3
AC007342.5
AC026471.4
AL445222.1
AC018695.6
SNHG10
SNHG9
AL359921.2
AC027348.1
MIR4713HG
AL117336.2
LINC02038
AC245884.8
AC006538.1
AL133371.2
AC093788.1
PCAT7
AC026401.3
AC069307.1
AL023284.4
AP002748.3
AC008555.5
HLA-DQB1-AS1
AC131235.3
HOXA-AS2
FIRRE
AC124016.2
AP003352.1
AC138956.2
MHENCR
AC002398.1
AC137767.1
DICER1-AS1
AL139089.1
AL021707.8
AL035661.1
AC138207.4
AL135905.1
AL118505.1
AL139385.1
AC120053.1
AC009262.1
AC099568.2
LINC00852
NARF-IT1
AL109614.1
LINC01290
AL358472.3
AC024075.2
SMIM25
AC008610.1
LINC002481
AC068831.6
AL162586.1
AL022322.1
AL138756.1
AL022328.2
AC092910.3
RAB30-AS1
AC099518.2
AC100814.1
AP002360.1
MIR181A2HG
LINC01876
LINC01133
TTC28-AS1
AC008764.6
AC137932.1
ERVE-1
LRRC75A-AS1
AC011462.4
HIF1A-AS2
AC011442.1
AL031055.1
AL133243.2
FTX
AC010273.2
MCCC1-AS1
AC100810.1
PTOV1-AS2
AC007255.1
AC008074.2
AL512598.1
PSMB8-AS1
AC131532.1
AC026356.1
PSPC1-AS2
TRHDE-AS1
AC008760.1
MIR29B2CHG
AC090515.2
AC079848.1
LINC00641
AC004596.1
ANKRD10-IT1
AC253536.3
AC009120.3
AL109936.6
AL354836.1
AC110792.3
AC026367.3
AL132989.1
AC132192.2
CYTOR
AL157932.1
AC009948.1
INE1
AC104758.2
AL049840.1
AC087741.1
AC005332.4
SNHG3
LINC01355
AL121839.2
AC129510.1
ADIRF-AS1
AC010275.1
ALG13-AS1
AF131216.3
AC078880.3
AC005009.1
AL645608.1
AL136295.7
AC007342.4
EP300-AS1
OIP5-AS1
AL355574.1
AC010618.2
Z69706.1
AC005993.1
AL358472.2
AL031667.3
AL139407.1
AL031670.1
ARHGAP27P1-BPTFP1-KPNA2P3
AC073046.1
AC011330.2
TMPO-AS1
AC080038.1
AC011472.4
AC026369.1
SNHG8
PINK1-AS
PSMA3-AS1
PARD3-AS1
AC046143.2
AC010542.5
AL604028.1
LINC01004
AC010503.4
ASMTL-AS1
AC064836.3
FBXL19-AS1
AC092279.1
AC002553.1
AP002840.2
BX470102.2
AC073335.2
AC093249.6
AC132807.2
AC011477.2
AC026801.2
AL139393.2
ERVK13-1
AC015922.2
AL020997.2
AP000894.4
AL591895.1
AL158847.1
AC074117.1
AC108062.1
FLJ45513
SCHLAP1
AC107068.1
AC006206.2
AL645940.1
AC000123.1
PLBD1-AS1
AC009120.2
AC132872.1
ZNF32-AS2
AP001625.2
AC080129.2
AC090181.2
LINC00324
LINC00885
CD44-AS1
AL391422.4
AC084824.4
AC011477.3
AC096586.2
AL049840.5
AP003392.1
LINC02598
MIR3936HG
CCDC18-AS1
AC139887.1
AC127024.4
EIF3J-DT
AC040977.1
HCG18
AP001362.2
CAHM
AC079610.2
AL121655.1
AL021578.1
AL021707.6
AC021016.2
TBX2-AS1
AC008035.1
PDXDC2P-NPIPB14P
AL033397.1
VIM-AS1
ZNF32-AS1
AP003469.2
C17orf82
AC005840.4
GABPB1-AS1
AC011503.2
AC108449.2
TMEM44-AS1
AC024361.1
H1FX-AS1
AL021878.2
AC090559.1
MCF2L-AS1
SNHG11
CARD8-AS1
AL513550.1
AC021491.4
AC103706.1
AC020913.3
RPARP-AS1
AC006270.1
AC091271.1
AC067838.1
KCCAT333
AC009090.6
SOS1-IT1
AC139887.4
AL132780.1
AP000866.5
RAB11B-AS1
AC098614.4
LINC02012
AL390728.6
AF129075.1
AC135050.5
AC010201.2
AC107952.2
AC108010.1
RALY-AS1
AC004223.3
AC147651.3
AC135050.6
TMEM51-AS1
AC004982.1
LNCTAM34A
PAXIP1-AS1
RHOXF1-AS1
AC005076.1
SNHG26
AC006566.1
AL096828.3
AC096677.1
AC060780.1
LINC02541
AL355075.2
MIR222HG
FAM160A1-DT
AC009318.2
LINC01106
AL162274.2
LINC01871
AC004975.2
AC002401.4
AC121764.1
AC093726.2
AL354993.2
AC073896.3
LINC00519
AC019131.2
AC012467.2
AC096992.2
OSER1-DT
AL591848.4
AC002128.2
AC040174.2
AC025171.4
CD27-AS1
AC010326.3
TP53TG1
AC004982.2
AC092119.2
AL450384.2
BNC2-AS1
AL109811.3
LINC01123
AC008608.2
